# Supplementary material for: Footprint of Positive Selection in Treponema pallidum subsp. pallidum Genome Sequences Suggests Adaptive Microevolution of the Syphilis Pathogen
Source: PLoS Negl Trop Dis. 2012 Jun 12;6(6):e1698. doi: 10.1371/journal.pntd.0001698 (PMC3373638; doi:10.1371/journal.pntd.0001698)
Supplement: File S3 — ORFs in T. pallidum Nichols strain that are not annotated in the Chicago strain genome. (PDF) [file pntd.0001698.s003.pdf]

**File S3. Hypothetical ORFs in Nichos that are not annotated in Chicago**

| <b>Locus Tag<br/>in Nichols<sup>1</sup></b> | <b>Product</b>        | <b>Size<br/>(aa)</b> | <b>Locus<br/>Tag in<br/>Nichols</b> | <b>Product</b>        | <b>Size<br/>(aa)</b> |
|---------------------------------------------|-----------------------|----------------------|-------------------------------------|-----------------------|----------------------|
| TP0012                                      | Hypothetical protein  | 60                   | TP0573                              | Hypothetical protein  | 30                   |
| TP0059                                      | Hypothetical protein  | 75                   | TP0583                              | Hypothetical protein  | 41                   |
| TP0129                                      | Hypothetical protein  | 158                  | TP0590                              | ribosomal protein L36 | 38                   |
| TP0130                                      | Hypothetical protein  | 139                  | TP0645                              | Hypothetical protein  | 58                   |
| TP0137                                      | Hypothetical protein  | 45                   | TP0656                              | Hypothetical protein  | 33                   |
| TP0161                                      | Hypothetical protein  | 30                   | TP0699                              | Hypothetical protein  | 36                   |
| TP0169                                      | Hypothetical protein  | 32                   | TP0749                              | Hypothetical protein  | 73                   |
| TP0180                                      | Hypothetical protein  | 52                   | TP0759                              | Hypothetical protein  | 39                   |
| TP0202                                      | Ribosomal protein S14 | 61                   | TP0791                              | Hypothetical protein  | 81                   |
| TP0209                                      | Ribosomal protein L36 | 37                   | TP0818                              | Hypothetical protein  | 50                   |
| TP0224                                      | Hypothetical protein  | 34                   | TP0857                              | Hypothetical protein  | 106                  |
| TP0232                                      | Hypothetical protein  | 38                   | TP0867                              | Hypothetical protein  | 61                   |
| TP0250                                      | Hypothetical protein  | 75                   | TP0871                              | Hypothetical protein  | 53                   |
| TP0311                                      | Hypothetical protein  | 47                   | TP0904                              | Hypothetical protein  | 83                   |
| TP0318                                      | Hypothetical protein  | 59                   | TP0909                              | Ribosomal protein L19 | 123                  |
| TP0332                                      | Hypothetical protein  | 41                   | TP0916                              | Hypothetical protein  | 42                   |
| TP0355                                      | Hypothetical protein  | 127                  | TP0932                              | Hypothetical protein  | 30                   |
| TP0409                                      | Hypothetical protein  | 61                   | TP0950                              | Hypothetical protein  | 94                   |
| TP0467                                      | Hypothetical protein  | 82                   | TP0955                              | Hypothetical protein  | 90                   |
| TP0495                                      | Hypothetical protein  | 49                   | TP1030                              | Hypothetical protein  | 165                  |
| TP0539                                      | Hypothetical protein  | 73                   |                                     |                       |                      |

<sup>1</sup> [ 6 ]
